# Supplementary material
Source: publisher figshare collection journal article supplement (https://acs.figshare.com/ndownloader/files/8906794)
Supplement: Supplementary file 1 [file 8906794]

# Electronic Supporting Information

## $\pi$ -Conjugated Chromophore Incorporated Polystyrene Nanobeads as Single Optical Agent for Three Channel Fluorescent Probe in Bioimaging Application

Sarabjot K Makkad <sup>a, b</sup> and S. K. Asha<sup>\*a, b 1</sup>

a) Polymer Science and Engineering Division, CSIR-National Chemical Laboratory, Dr Homi Bhabha Road, Pune 411008, India.

b) Academy of Scientific and Innovative Research, New Delhi, India

---

---

<sup>1</sup> Corresponding Author: S. K. Asha, E-mail: [sk.asha@ncl.res.in](mailto:sk.asha@ncl.res.in) Fax: 0091-20-25902615.

## Table of Content

| Section    | Subject                                                                                                                                                                                                                                                                              | Page |
|------------|--------------------------------------------------------------------------------------------------------------------------------------------------------------------------------------------------------------------------------------------------------------------------------------|------|
| <b>S1</b>  | Synthetic scheme of <b>PBI Cross-linker</b>                                                                                                                                                                                                                                          | S1   |
| <b>S2</b>  | Synthetic scheme of <b>OPV Cross-linker</b>                                                                                                                                                                                                                                          | S2   |
| <b>S3</b>  | <sup>1</sup> H-NMR of <b>PBI Cross-linker</b> recorded in CDCl <sub>3</sub>                                                                                                                                                                                                          | S7   |
| <b>S4</b>  | <sup>1</sup> H-NMR of <b>OPV Cross-linker</b> recorded in CDCl <sub>3</sub>                                                                                                                                                                                                          | S7   |
| <b>S5</b>  | High resolution Mass spectra of <b>PBI Cross-linker</b> recorded in acetonitrile                                                                                                                                                                                                     | S8   |
| <b>S6</b>  | High resolution Mass spectra of <b>OPV Cross-linker</b> recorded in acetonitrile                                                                                                                                                                                                     | S8   |
| <b>S7</b>  | GPC chromatogram of (a) <b>PBI-PS-n /OPV(PBI)-PS</b><br>(b) <b>OPV-PS-n</b> polymers in THF with flow rate of 1ml/min                                                                                                                                                                | S9   |
| <b>S8</b>  | TGA (Thermogravimetric analysis) of respective polymer samples                                                                                                                                                                                                                       | S9   |
| <b>S9</b>  | <sup>1</sup> H NMR spectra of (a) <b>OPV-PS-7</b> (b) <b>PBI-PS-5</b> recorded in CDCl <sub>3</sub>                                                                                                                                                                                  | S10  |
| <b>S10</b> | Solution state emission spectra showing the dependence of fluorescence intensity on temperature varied from 0°C to 60°C.                                                                                                                                                             | S10  |
| <b>S11</b> | Solution state emission spectra showing the dependence of fluorescence intensity on pH varied from 1 to 14.                                                                                                                                                                          | S11  |
| <b>S12</b> | Solution state emission and excitation spectra for PS(OPV7+PBI3) (0.1 mg / 3ml) in 1X PBS buffer                                                                                                                                                                                     | S11  |
| <b>S13</b> | Normalized emission spectra upon excitation at 350 nm for PS(OPV7+PBI3) (physical mixture) and OPV(PBI)-PS (covalent) polymer at concentration (0.1 mg / 3ml) in 1X PBS buffer showing FRET induced PBI emission in case of covalent OPV(PBI)-PS polymer.                            | S12  |
| <b>S14</b> | Fluorescence optical microscopy images of (a) <b>OPV-PS-7</b> (A) Bright field (B) using <b>DAPI</b> ( Blue, 350-430 nm) filter (b) <b>PBI-PS-3</b> (C) Bright Field (D) using <b>Alexa</b> (Green, 488-520 nm) (E) <b>Rhodamine</b> (Red, 480-580 nm) filters and (F) Merged Image. | S12  |
| <b>S15</b> | CIE coordinate diagrams of (a) <b>OPV-PS-n</b> (b) <b>PBI-PS-n</b>                                                                                                                                                                                                                   | S13  |
| <b>S16</b> | Flow cytometry plots in HeLa cell lines after 9 h incubation                                                                                                                                                                                                                         | S13  |
| <b>S17</b> | Flow cytometry plots in MCF-7 cells after 24 h and 9 h incubation.                                                                                                                                                                                                                   | S14  |
| <b>S18</b> | Comparison of solution state emission spectra for OPV-PS-7 and PS_alone in 1X PBS buffer (0.1 mg / 3ml).                                                                                                                                                                             | S15  |
| <b>S19</b> | CLSM image of phalloidin staining of PBI-PS-3 in HeLa cells                                                                                                                                                                                                                          | S15  |

|                   |                                                                                                                                                               |     |
|-------------------|---------------------------------------------------------------------------------------------------------------------------------------------------------------|-----|
| <b>S20</b>        | CLSM image of HeLa cells incubated with PS(OPV7+PBI3)<br>(physical mixture)                                                                                   | S15 |
| <b>Table S1:</b>  | Sample designation, Number and Weight Average Molar Mass,<br>Polydispersity indices ( $\bar{M}_w/\bar{M}_n$ ), Solid Content (%), Zeta potential ( $\zeta$ ). | S16 |
| <b>Table S2:</b>  | Recipe for miniemulsion polymerization .                                                                                                                      | S17 |
| <b>Table S3:</b>  | Comparison of average size of particles obtained from TEM and FESEM.                                                                                          | S17 |
| <b>Table S4a:</b> | CIE coordinate values for <b>OPV-PS-n/ PBI-PS-n</b> .                                                                                                         | S18 |
| <b>Table S4b:</b> | CIE coordinate values for <b>OPV(PBI)-PS polymer</b> at different<br>excitation wavelength.                                                                   | S18 |

**S1 :- Synthetic Scheme of PBI Cross-linker.**

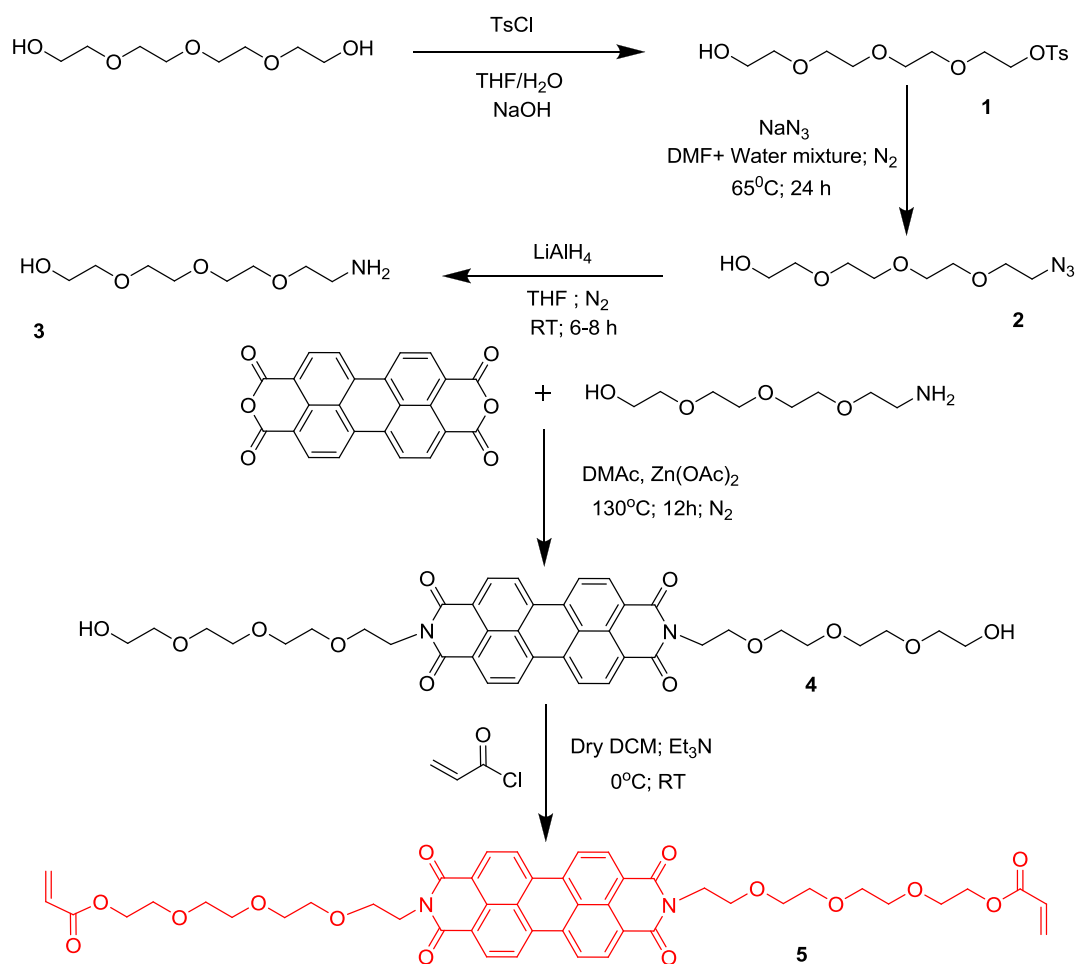

**S2 :- Synthetic Scheme of OPV Cross-linker.**

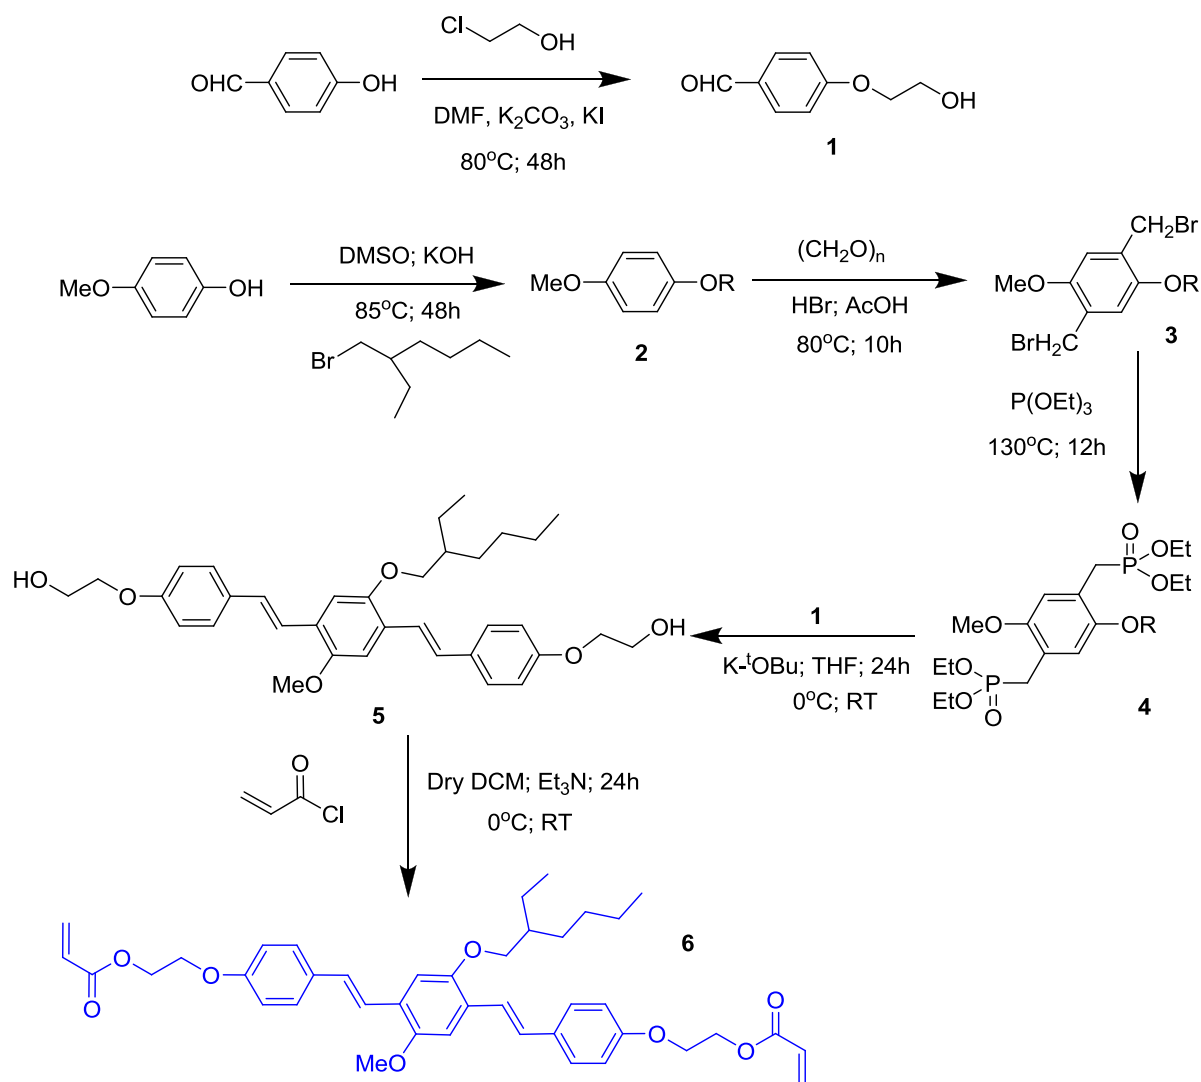

The cross-linkers were synthesized using previously reported procedure.<sup>references 37, 40 main text</sup>

### **Synthesis of PBI based cross-linker:-**

400 mg PBI-TEG diol ( $5.4 \times 10^{-4}$  mol) and 0.22 ml triethylamine ( $2.7 \times 10^{-3}$  mol) were taken in 250 ml two necked round bottomed flask along with 50 ml dry DCM under nitrogen atmosphere. The flask was kept for stirring under ice cooled condition for 30 min followed by slow addition of acryloyl chloride (0.22 ml,  $2.7 \times 10^{-3}$  mol) over a period of 20 min at 0°C. After the addition it was brought to room temperature slowly. Then the reaction was allowed to stir for 24 h. The progress of reaction was timely monitored using TLC. The reaction was worked up by washing the organic phase with water and brine and then organic phase was evaporated off. Finally the compound was column purified using DCM/Methanol (1%) as solvent. Yield (30%). 120 mg.

<sup>1</sup>H-NMR (400 MHz, CDCl<sub>3</sub>, δ) :- 8.69 (m, 8H, perylene ring), 6.39 (dd, 2H, acrylic double bond), 6.13 (q, 2H, acrylic double bond), 5.84 (dd, 2H, acrylic double bond), 4.49 (t, 4H, -NCH<sub>2</sub>), 4.30 (t, 4H, -NCH<sub>2</sub>), 3.89 (t, 4H), 3.62 (m, 20H).

<sup>13</sup>C-NMR (100 MHz, CDCl<sub>3</sub>, δ) :- 165.88, 163.10, 134.32, 131.15, 130.71, 129.09, 128.01, 126.10, 122.83, 77.33, 69.89, 69.83, 67.66, 63.42, 39.07.

LC-MS/MS for C<sub>46</sub>H<sub>46</sub>N<sub>2</sub>O<sub>14</sub> (in AcCN) :- m/z calculated 850.29. Found :- 851.30 [M + H], 873.28 [M + Na].

### **Synthesis of OPV based cross-linker :-**

In 250 ml two- necked round-bottomed flask, 265 mg OPV diol ( $4.7 \times 10^{-4}$  mol) and 0.33 ml of triethylamine ( $2.4 \times 10^{-3}$  mol) were dissolved in 50 ml of dry DCM under nitrogen atmosphere. Then it was allowed to stir for 30 min at 0°C. 0.2 ml ( $2.4 \times 10^{-3}$  mol) of acryloyl chloride was taken in DCM and added to the flask for a period of 20 min at 0°C. Reaction was allowed to stir at room temperature for 24 h and timely monitored by TLC. Crude compound was worked up by washing with water and then organic phase was dried off and it was further purified by column chromatography using Pet ether/ EtOAc (20%) as solvent system. Yield (50%). 132 mg.

<sup>1</sup>H-NMR (400 MHz, CDCl<sub>3</sub>, δ) :- 7.49-6.93 (3m, 14H, Ar-H, vinylic H), 6.45 (dd, 2H, acrylic double bond), 6.20 (m, 2H, acrylic double bond), 5.89 (dd, 2H, acrylic double bond), 4.54 (m, 2H, -ArOCH<sub>2</sub>), 4.27 (m, 2H, -C(O)OCH<sub>2</sub>), 3.92 (m, 4H), 1.83 (b, 1H, tert), 1.37 (m, 6H), 0.99 (m, 6H).

<sup>13</sup>C-NMR (100 MHz, CDCl<sub>3</sub>, δ) :- 165.85, 163.14, 150.92, 131.10, 127.82, 127.56, 127.41, 121.45, 114.6, 71.56, 65.73, 62.86, 56.12, 39.54, 30.89, 30.69, 29.01, 23.98, 22.85, 13.85, 11.07.

LC-MS/MS for  $C_{46}H_{46}N_2O_{14}$  (in AcCN) :- m/z calculated 668.33. Found :- 669.34 [M + H], 691.32 [M + Na].

**S3:-**  $^1H$ -NMR spectra of PBI Cross-linker recorded in  $CDCl_3$ .

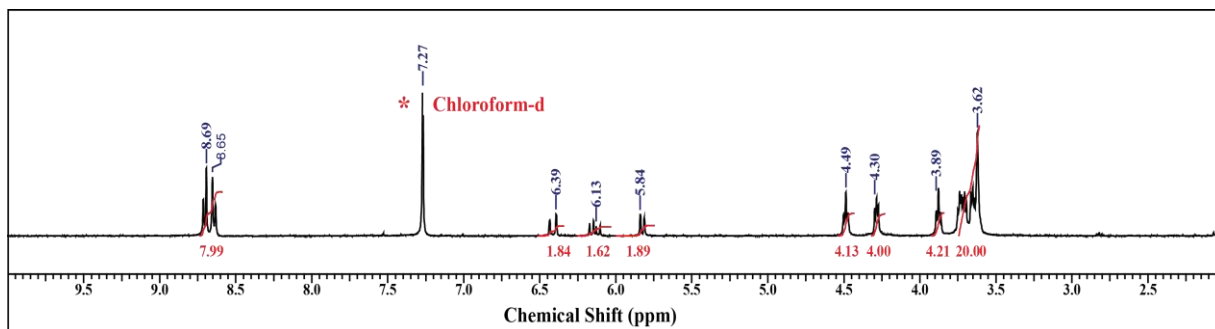

**S4 :-**  $^1H$ -NMR spectra of OPV Cross-linker recorded in  $CDCl_3$ .

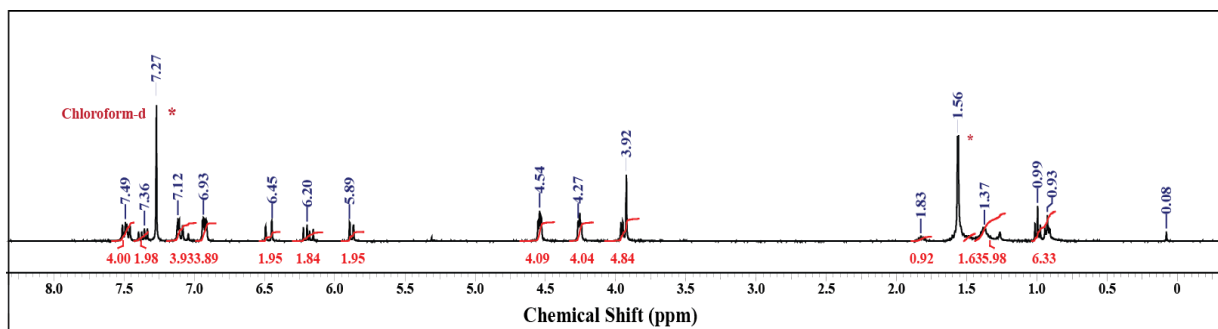

**S5 :-** HRMS spectra of PBI Cross-linker recorded in acetonitrile.

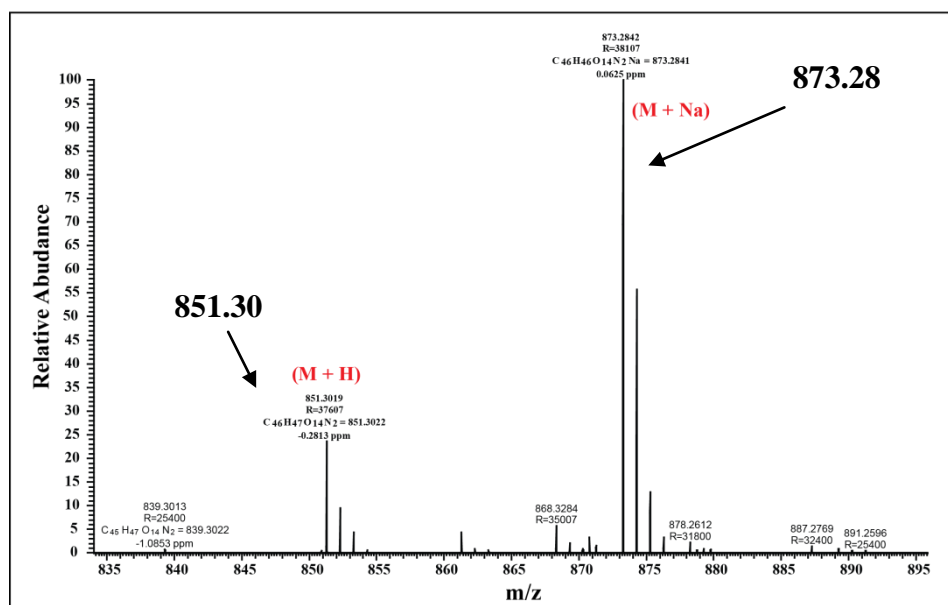

**S6 :-** HRMS spectra of OPV Cross-linker recorded in acetonitrile.

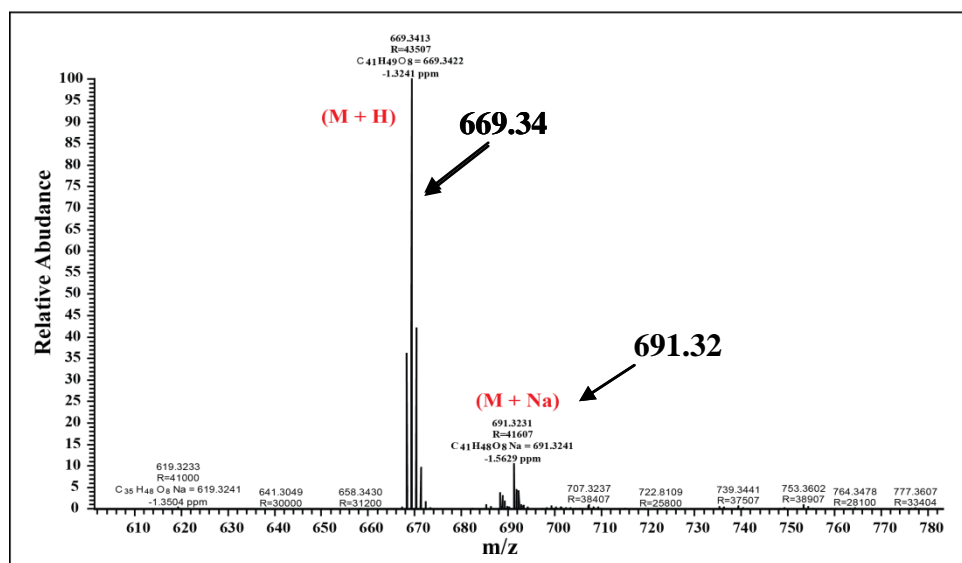



**S7.** GPC Chromatogram of (a) **PBI-PS-n /OPV(PBI)-PS** (left) (b) **OPV-PS-n** polymers (right) in THF with flow rate of 1ml/min.

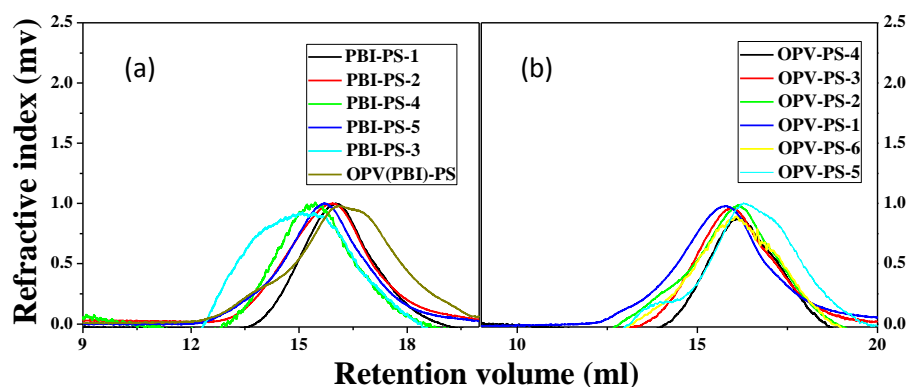

**S8.** TGA (Thermogravimetric analysis) of polymer samples.

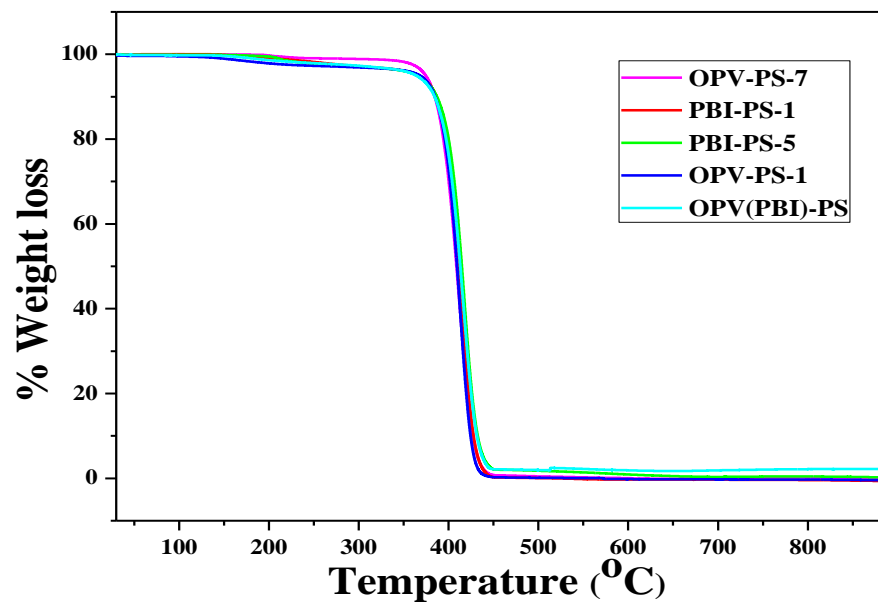

**S9a.**  $^1\text{H}$ -NMR spectra of OPV-PS-7 polymer recorded in  $\text{CDCl}_3$ .

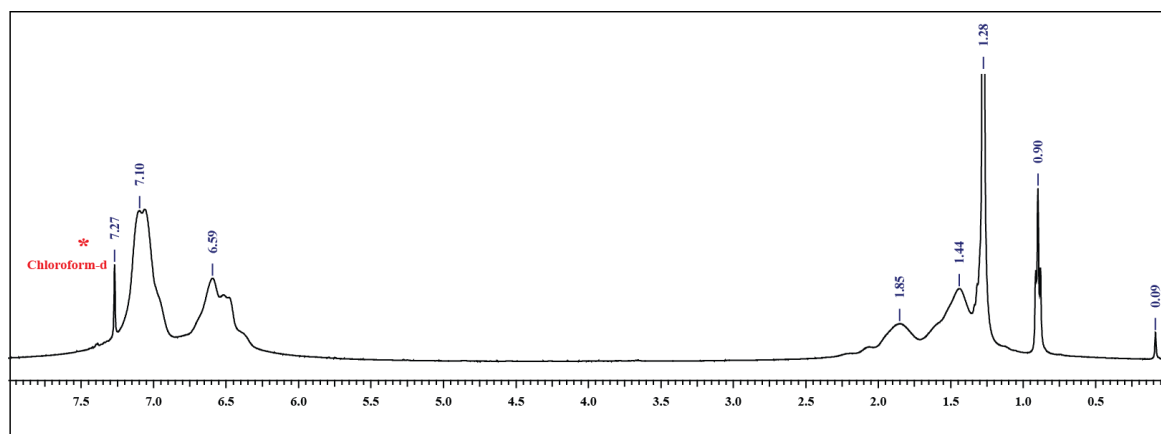

**S9b.**  $^1\text{H}$ -NMR spectra of PBI-PS-5 polymer recorded in  $\text{CDCl}_3$ .

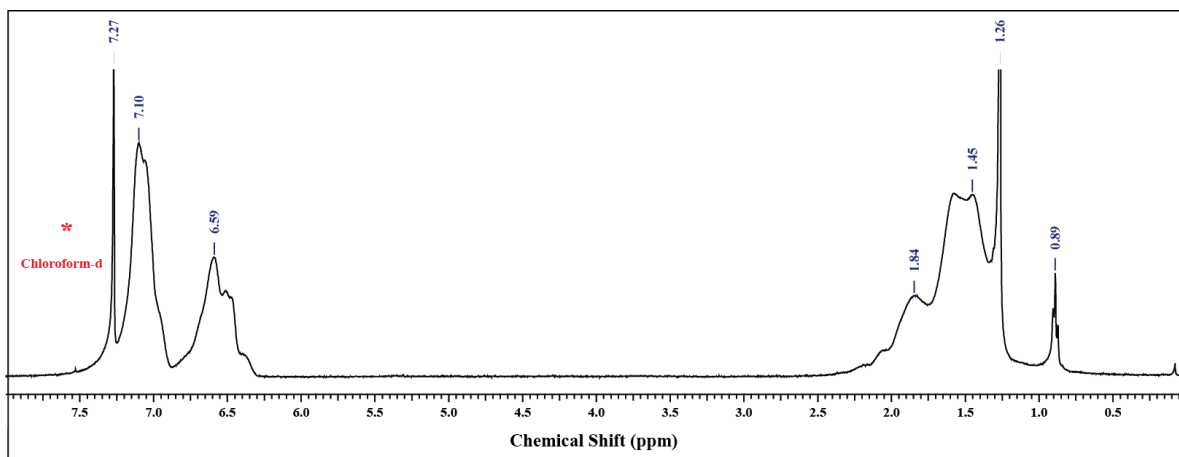

**S10.** Solution state emission spectra showing the dependence of fluorescence intensity on temperature varied from  $0^\circ\text{C}$  to  $60^\circ\text{C}$  for a) OPV(PBI)-PS b) OPV-PS-n (c) PBI-PS-n polymers. (0.1 mg / 3ml) in 1X PBS buffer.

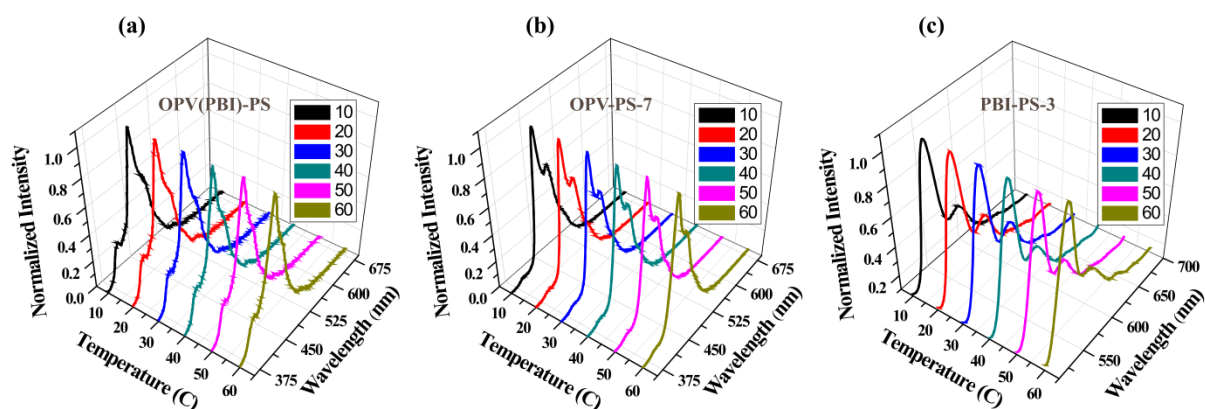

**S11.** Solution state emission spectra showing the dependence of fluorescence intensity on pH varied from 1 to 14 for a) OPV(PBI)-PS b) OPV-PS-n (c) PBI-PS-n polymers. (0.1 mg / 3ml) in 1X PBS buffer.

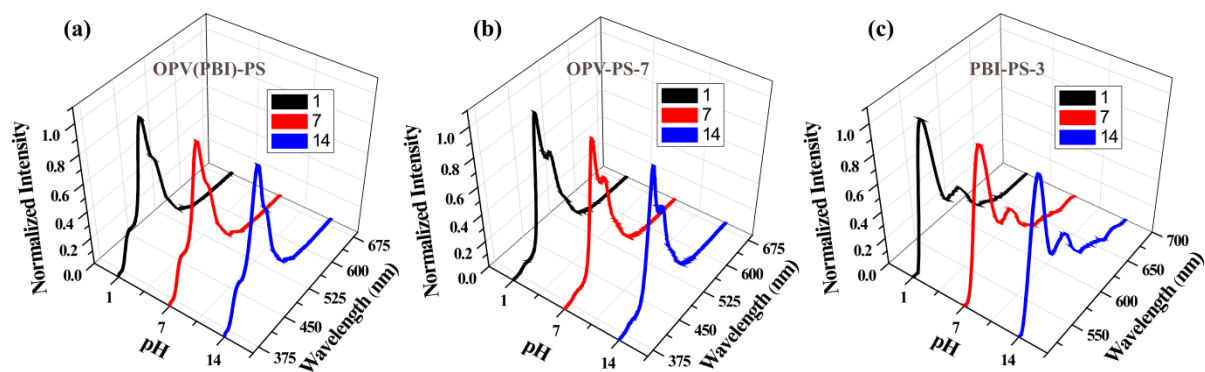

**S12 .** Solution state emission and excitation spectra for PS(OPV7+PBI3) (0.1 mg / 3ml) in 1X PBS buffer.

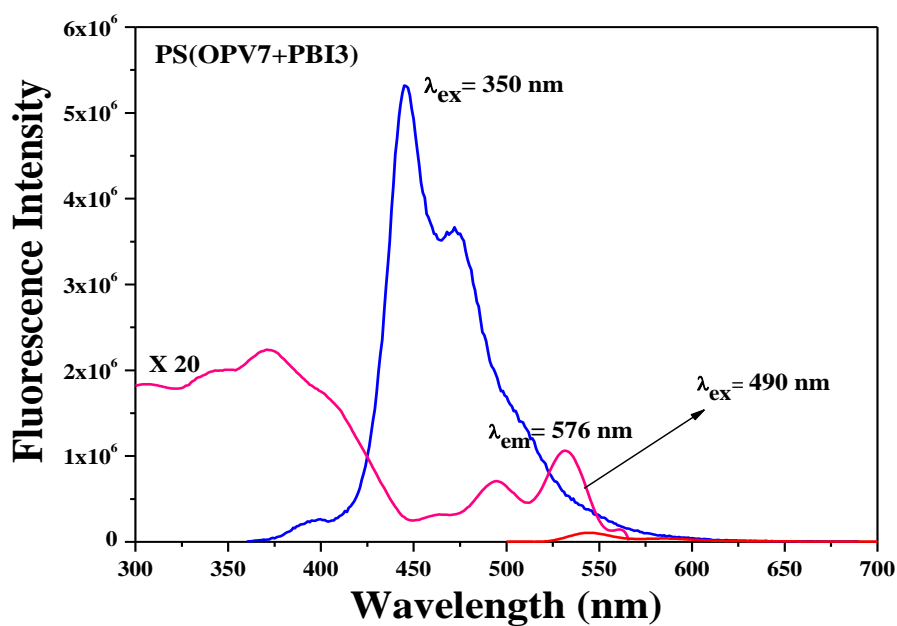

**S13.** Normalized emission spectra upon excitation at 350 nm for PS(OPV7+PBI3) (physical mixture) and OPV(PBI)-PS (covalent) polymer at concentration (0.1 mg / 3ml) in 1X PBS buffer showing FRET induced PBI emission in case of covalent OPV(PBI)-PS polymer.

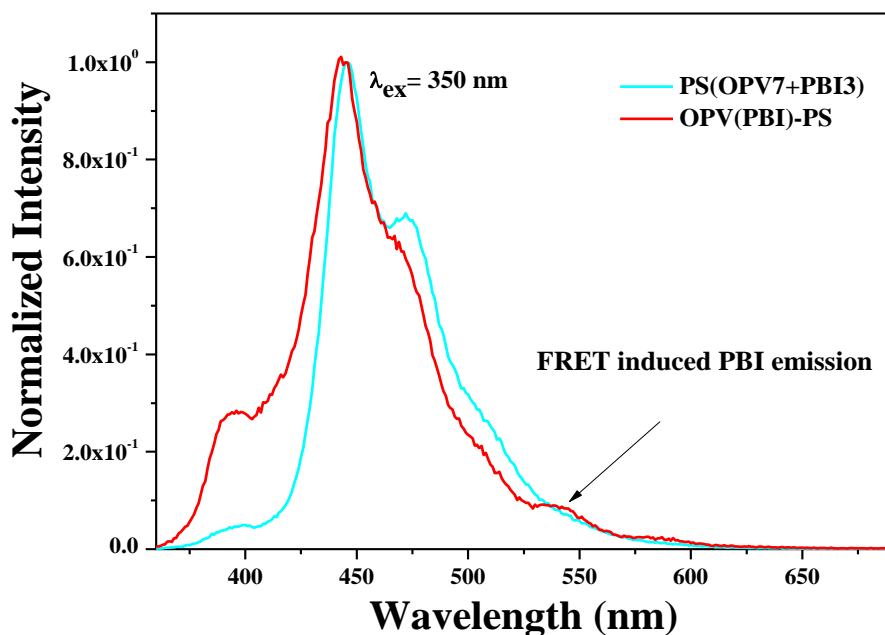

**S14.** Fluorescence optical microscopy images of (a) **OPV-PS-7** (A) Bright field (B) using DAPI ( Blue, 350-430 nm) filter (Top) (b) **PBI-PS-3** (C) Bright Field (D) using Alexa (Green, 488-520 nm) (E) Rhodamine (Red, 480-580 nm) filters and (F) Merged Image (Bottom).

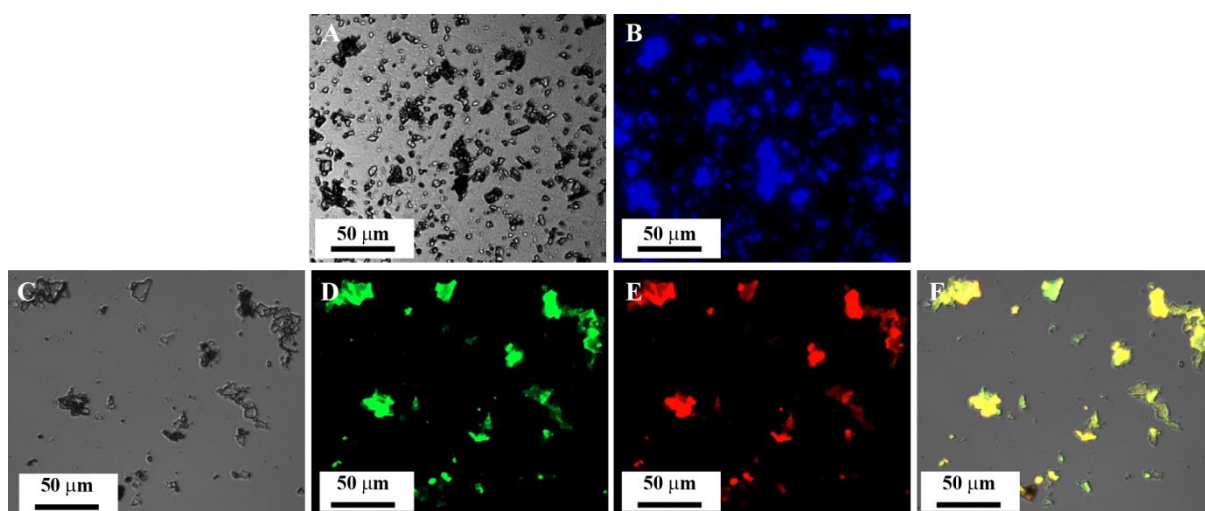

**S15.** CIE coordinate diagrams of **PBI-PS-n** (left), **OPV-PS-n** (right).

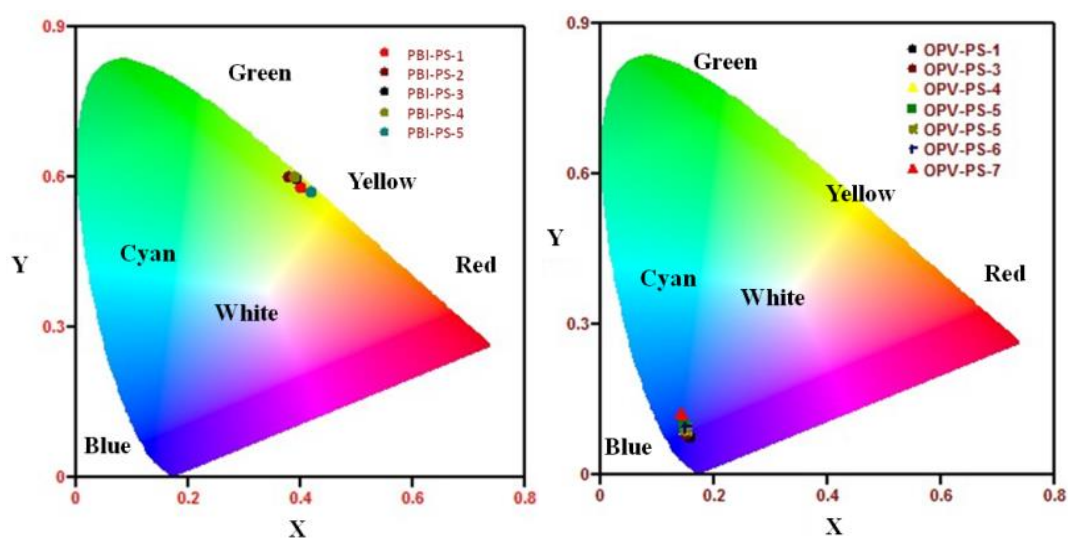

**S16.** Flow cytometry plots for control (a), OPV(PBI)-PS (b), OPV-PS-7 (c) and PBI-PS-3 (d) in HeLa cell lines after 9 h incubation.

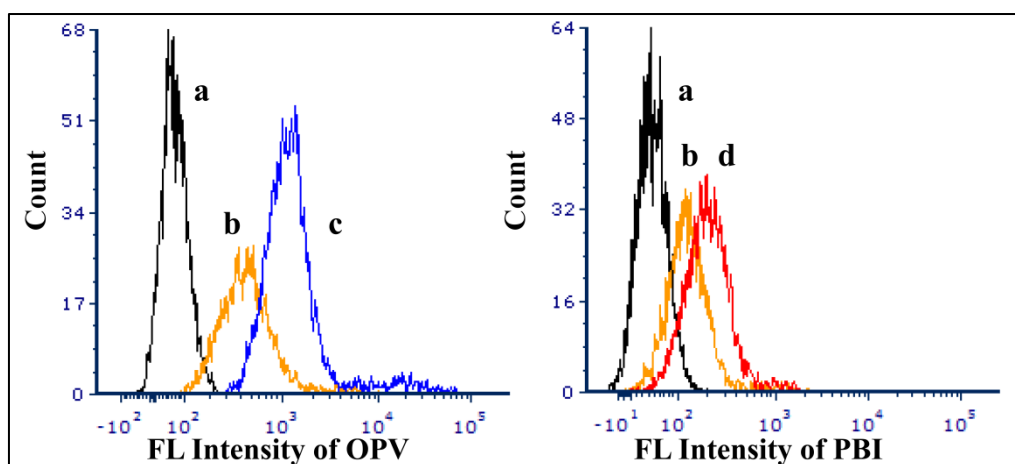

**S17.** Flow cytometry plots for control (a), OPV(PBI)-PS (b), OPV-PS-7 (c) and PBI-PS-3 (d) in MCF-7 cell lines after 24 h (1) and 9h (2) incubation.

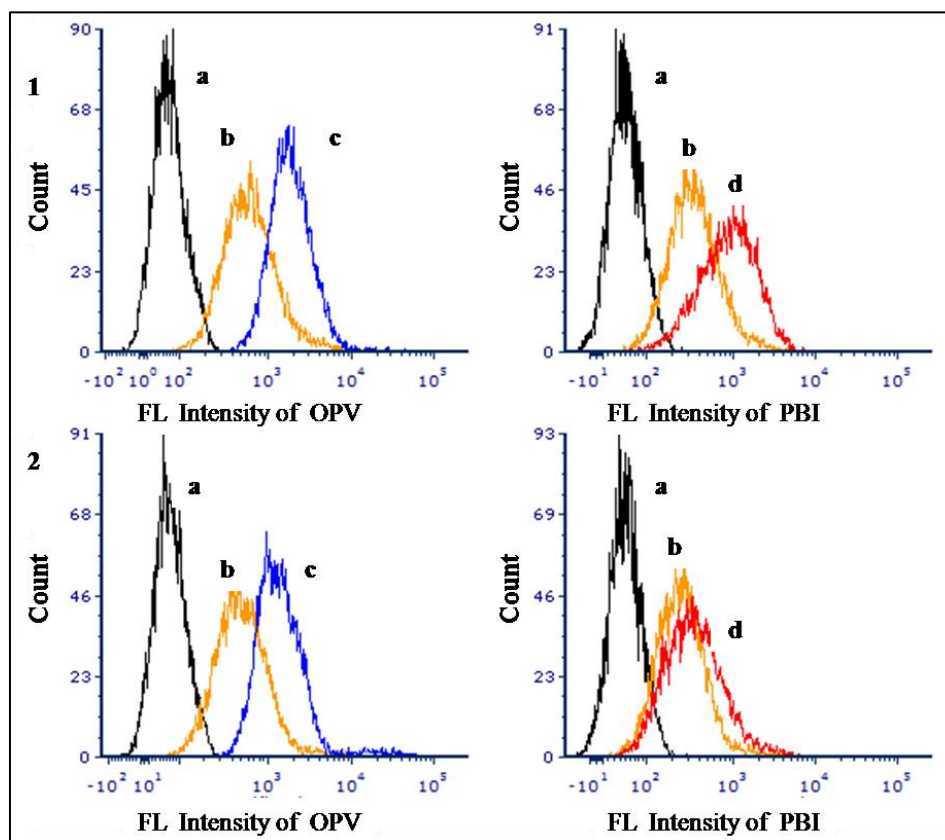

**S18.** Comparison of solution state emission spectra for OPV-PS-7 and PS\_alone in 1X PBS buffer (0.1 mg / 3ml).

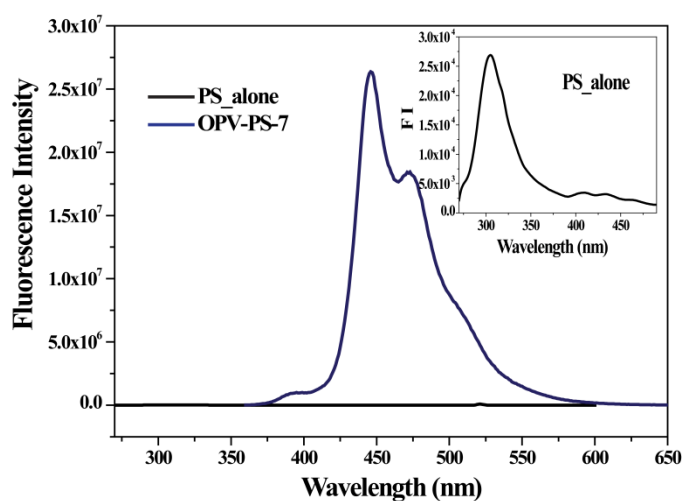

**S19.** CLSM image of Phalloidin staining of PBI-PS-3 in HeLa cells.

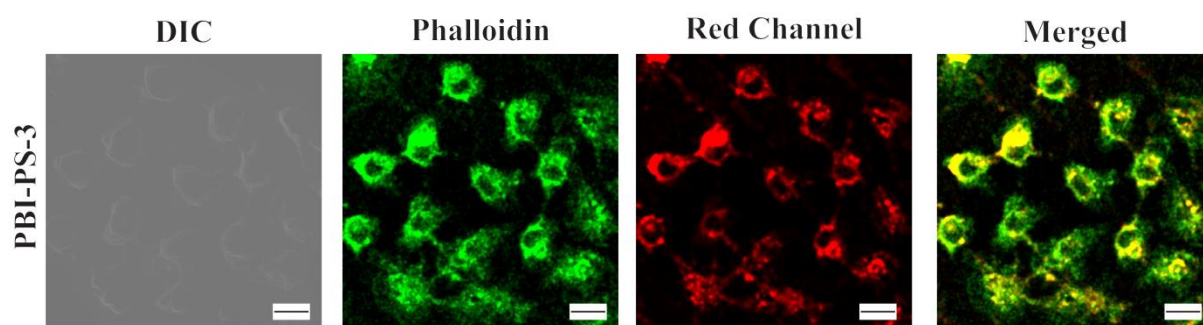

**S20.** CLSM image of HeLa cells incubated with PS(OPV7+PBI3) (physical mixture).

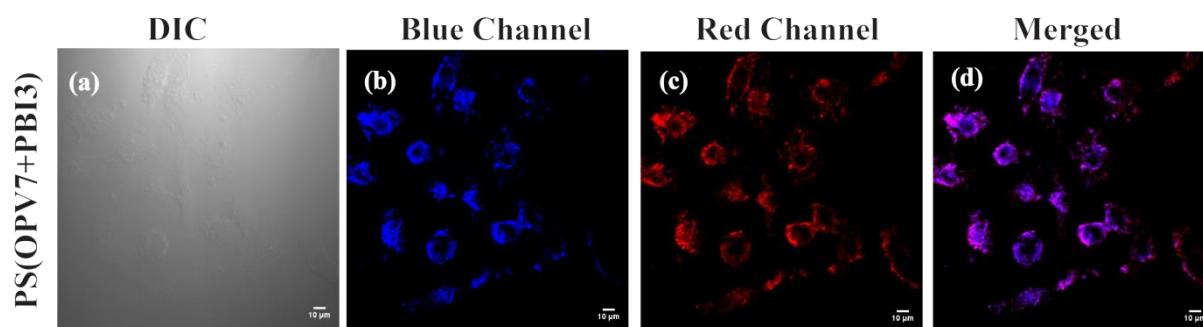

**Table S1.** Sample designation, Number and Weight Average Molar Mass, Polydispersity indices ( $\bar{M}_w/\bar{M}_n$ ), Solid Content (%), Zeta potential ( $\zeta$ )

| <b>Samples</b>     | <b><math>\bar{M}_n^a</math></b> | <b><math>\bar{M}_w^a</math></b> | <b>PDI<sup>a</sup></b> | <b>Solid content (%)</b> | <b><math>\zeta</math>-Potential (mV)<sup>b</sup></b> | <b>TGA (T<sub>d</sub>= 5%)</b> |
|--------------------|---------------------------------|---------------------------------|------------------------|--------------------------|------------------------------------------------------|--------------------------------|
| <b>OPV-PS-1</b>    | 121000                          | 360000                          | 2.9                    | 12.8                     | -30.5                                                | 365                            |
| <b>OPV-PS-2</b>    | 94900                           | 313000                          | 3.3                    | 10.5                     | -32.1                                                | -                              |
| <b>OPV-PS-3</b>    | 100200                          | 224000                          | 2.2                    | 13.2                     | -27.1                                                | -                              |
| <b>OPV-PS-4</b>    | 82300                           | 167000                          | 2.0                    | 14.2                     | -29.0                                                | -                              |
| <b>OPV-PS-5</b>    | 53400                           | 207900                          | 3.8                    | 20.0                     | -31.8                                                | -                              |
| <b>OPV-PS-6</b>    | 88000                           | 303200                          | 3.4                    | 20.4                     | -29.7                                                | -                              |
| <b>OPV-PS-7</b>    | -                               | -                               | -                      | 19.8                     | -33.6                                                | 365                            |
|                    |                                 |                                 |                        |                          |                                                      |                                |
| <b>PBI-PS-1</b>    | 74500                           | 207300                          | 2.7                    | 19.3                     | -30.0                                                | 365                            |
| <b>PBI-PS-2</b>    | 97100                           | 280900                          | 2.9                    | 18.6                     | -27.4                                                | -                              |
| <b>PBI-PS-3</b>    | 152100                          | 651900                          | 4.2                    | 15.3                     | -35.7                                                | -                              |
| <b>PBI-PS-4</b>    | 117600                          | 358300                          | 3.0                    | 18.0                     | -34.4                                                | -                              |
| <b>PBI-PS-5</b>    | 126900                          | 360300                          | 2.8                    | 12.7                     | -30.7                                                | 365                            |
|                    |                                 |                                 |                        |                          |                                                      |                                |
| <b>OPV(PBI)-PS</b> | 59100                           | 242600                          | 4.1                    | 20.5                     | -31.1                                                | 365                            |

a) Measured by Gel Permeation Chromatography (GPC) in tetrahydrofuran (THF) calibrated with linear, narrow molecular weight distribution polystyrene standards.

b) Measured at pH 7 using 0.001M KCl as background electrolyte.



**Table S2:** Recipe for miniemulsion polymerization.

| <b>Components</b>   | <b>Amount</b> |
|---------------------|---------------|
| <b>Water</b>        | 4 gm          |
| <b>Styrene</b>      | 1 gm          |
| <b>Cross-linker</b> | Varied        |
| <b>Hexadecane</b>   | 48 mg         |
| <b>SDS</b>          | 12 -36 mg     |
| <b>KPS</b>          | 3.3 mg        |

Except OPV-PS-7 and PBI-PS-3 (where SDS was taken 36 mg) the amount of SDS used for all the polymers was 12 mg. Amount of cross-linkers used were already discussed in Table 1.

**Table S3:** Comparison of average size of particles obtained from TEM and FESEM.

| <b>Samples</b>          | <b>Average<br/>Size from<br/>TEM<br/>(nm)</b> | <b>Average<br/>Size from<br/>FESEM<br/>(nm)</b> |
|-------------------------|-----------------------------------------------|-------------------------------------------------|
| <b>OPV-PS-6</b>         | 75.6±3                                        | 76.5±4                                          |
| <b>OPV-PS-2</b>         | -                                             | 97.6±9                                          |
| <b>OPV_PS-3</b>         | -                                             | 92.9±5                                          |
| <b>PBI-PS-4</b>         | 72.4±3                                        | -                                               |
| <b>PBI-PS-5</b>         | -                                             | 75.6±6                                          |
| <b>OPV(PBI)-<br/>PS</b> | 79.5±5                                        | 80.5±4                                          |

**Table S4a:** CIE coordinate values for **OPV(PBI)-PS/ PBI-PS-n** .

| <b>Samples</b>  | <b>X</b> | <b>Y</b> |
|-----------------|----------|----------|
| <b>OPV-PS-1</b> | 0.16     | 0.12     |
| <b>OPV-PS-2</b> | 0.15     | 0.10     |
| <b>OPV-PS-3</b> | 0.16     | 0.07     |
| <b>OPV-PS-4</b> | 0.15     | 0.09     |
| <b>OPV-PS-5</b> | 0.15     | 0.10     |
| <b>OPV-PS-6</b> | 0.15     | 0.09     |
| <b>OPV-PS-7</b> | 0.14     | 0.12     |
| <b>PBI-PS-1</b> | 0.40     | 0.58     |
| <b>PBI-PS-2</b> | 0.38     | 0.60     |
| <b>PBI-PS-3</b> | 0.39     | 0.60     |
| <b>PBI-PS-4</b> | 0.39     | 0.60     |
| <b>PBI-PS-5</b> | 0.42     | 0.57     |

**Table S4b:** CIE coordinate values for **OPV(PBI)-PS** polymer at different excitation wavelength.

| <b>Samples</b> | <b>X</b> | <b>Y</b> |
|----------------|----------|----------|
| <b>350</b>     | 0.15     | 0.11     |
| <b>390</b>     | 0.15     | 0.10     |
| <b>440</b>     | 0.15     | 0.19     |
| <b>450</b>     | 0.24     | 0.39     |
| <b>460</b>     | 0.37     | 0.56     |
| <b>470</b>     | 0.39     | 0.57     |
| <b>490</b>     | 0.38     | 0.60     |
